# Supplementary material for: Analysis of short contacts in crystals of halogenated amino acids: atom–atom interactions vs. energy frameworks
Source: Royal Society of Chemistry journal article supplement (doi:10.1039/d3ce01029e), 2023-12-14
Supplement: d3ce01029e1.pdf [file d3ce01029e1.pdf]

## Electronic Supplementary Information

# **Analysis of short contacts in crystals of halogenated amino acids: atom-atom interactions vs. energy frameworks**

Francois J. De Beer, Fredrick J. F. Jacobs, Akho Ntsila, Dumisani V. Kama,\* Vladimir A. Azov\*

Department of Chemistry, University of the Free State, P.O. Box 339, 9300 Bloemfontein, South Africa.

\* Corresponding author, email: [azovv@ufs.ac.za](mailto:azovv@ufs.ac.za), [kamadv@ufs.ac.za](mailto:kamadv@ufs.ac.za)

### Table of Contents

|                                                                   |    |
|-------------------------------------------------------------------|----|
| Hirshfeld surface of Boc-Ala(3-Cl)-OMe (1) .....                  | 2  |
| Fingerprint plot of Boc-Ala(3-Cl)-OMe (1) .....                   | 2  |
| Hirshfeld surface of Boc-Ala(3-Cl)-O <sup>t</sup> Bu (2) .....    | 3  |
| Fingerprint plot of Boc-Ala(3-Cl)-O <sup>t</sup> Bu (2) .....     | 3  |
| Hirshfeld surface of Boc-Ala(3-Cl)-OBn (3) .....                  | 4  |
| Fingerprint plot of Boc-Ala(3-Cl)-OBn (3) .....                   | 4  |
| Hirshfeld surface of Fmoc-Ala(3-Cl)-O <sup>t</sup> Bu (4) .....   | 5  |
| Fingerprint plot of Fmoc-Ala(3-Cl)-O <sup>t</sup> Bu (4) .....    | 5  |
| Hirshfeld surface of Boc-Ala(3-I)-OMe (5) .....                   | 6  |
| Fingerprint plot of Boc-Ala(3-I)-OMe (5) .....                    | 6  |
| Hirshfeld surface of Boc-Ala(3-I)-O <sup>t</sup> Bu (6) .....     | 7  |
| Fingerprint plot of Boc-Ala(3-I)-O <sup>t</sup> Bu (6) .....      | 7  |
| Hirshfeld surface of Boc-Ala(3-I)-OBn (7) .....                   | 8  |
| Fingerprint plot of Boc-Ala(3-I)-OBn (7) .....                    | 8  |
| Hirshfeld surface of Fmoc-Ala(3-I)-O <sup>t</sup> Bu (8) .....    | 9  |
| Fingerprint plot of Fmoc-Ala(3-I)-O <sup>t</sup> Bu (8) .....     | 9  |
| NMR characterization of Boc-Ala(3-Cl)-O <sup>t</sup> Bu (2) ..... | 10 |
| NMR characterization of Boc-Ala(3-Cl)-OBn (3) .....               | 11 |



### Hirshfeld surface of Boc-Ala(3-Cl)-OMe (**1**)

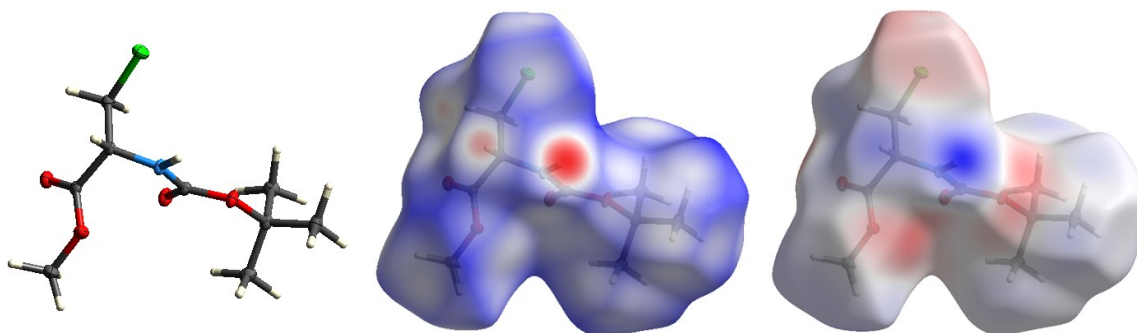

**Figure S1.** Molecular structure of **1** (left) and its Hirshfeld surface mapped with  $d_{\text{norm}}$  (middle) and ESP (right).

### Fingerprint plot of Boc-Ala(3-Cl)-OMe (**1**)

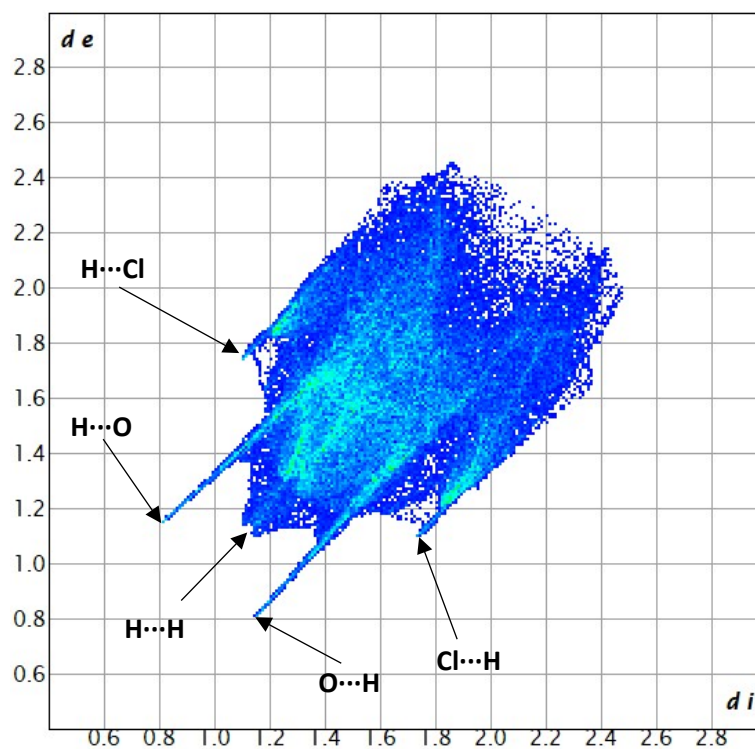

**Figure S2.** Fingerprint plot of **1**. Important intermolecular contacts are indicated with arrows.

### Hirshfeld surface of Boc-Ala(3-Cl)-O<sup>t</sup>Bu (2)

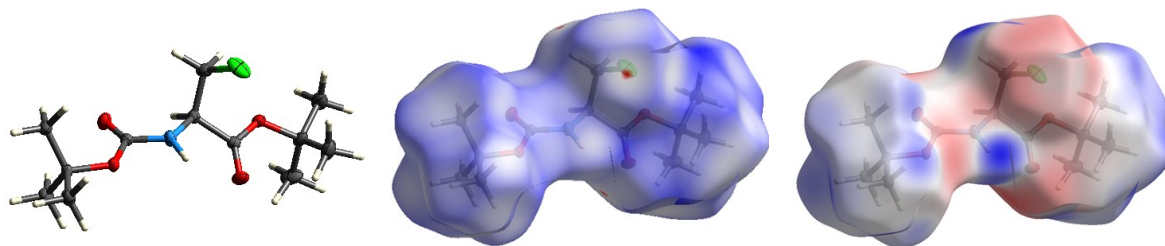

**Figure S3.** Molecular structure of **2** (left) and its Hirshfeld surface mapped with  $d_{\text{norm}}$  (middle) and ESP (right).

### Fingerprint plot of Boc-Ala(3-Cl)-O<sup>t</sup>Bu (2)

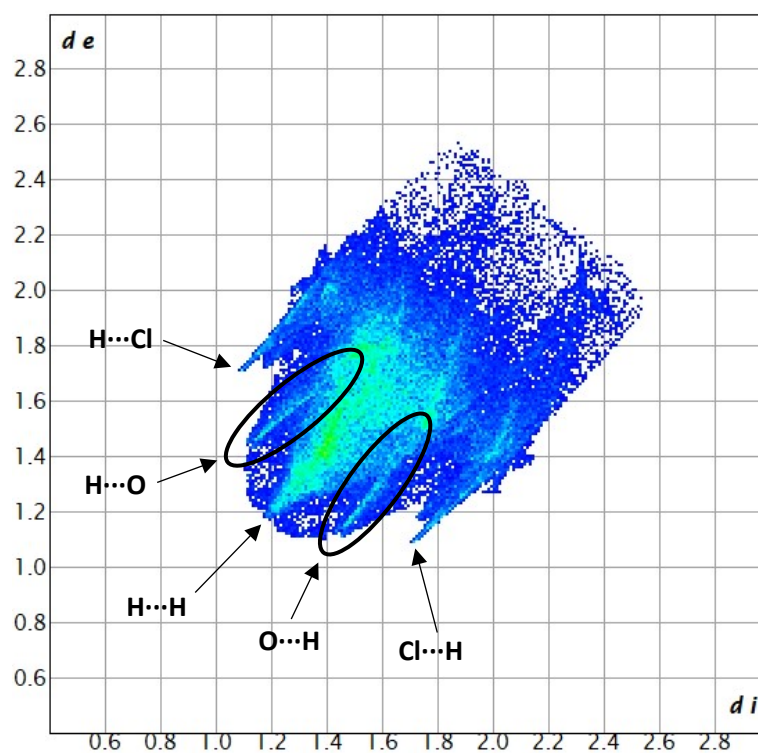

**Figure S4.** Fingerprint plot of **2**. Important intermolecular contacts are indicated with arrows.

### Hirshfeld surface of Boc-Ala(3-Cl)-OBn (**3**)

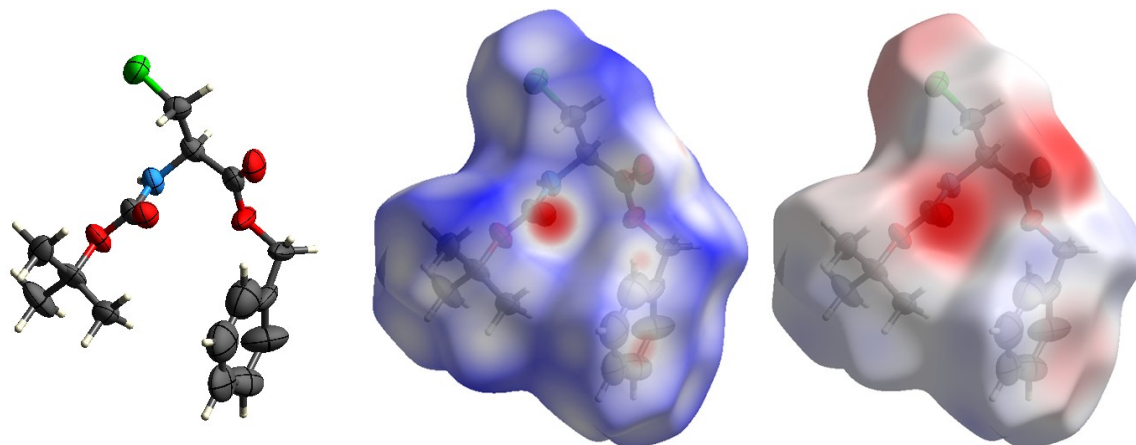

Figure S5. Molecular structure of **3** (left) and its Hirshfeld surface mapped with  $d_{\text{norm}}$  (middle) and ESP (right).

### Fingerprint plot of Boc-Ala(3-Cl)-OBn (**3**)

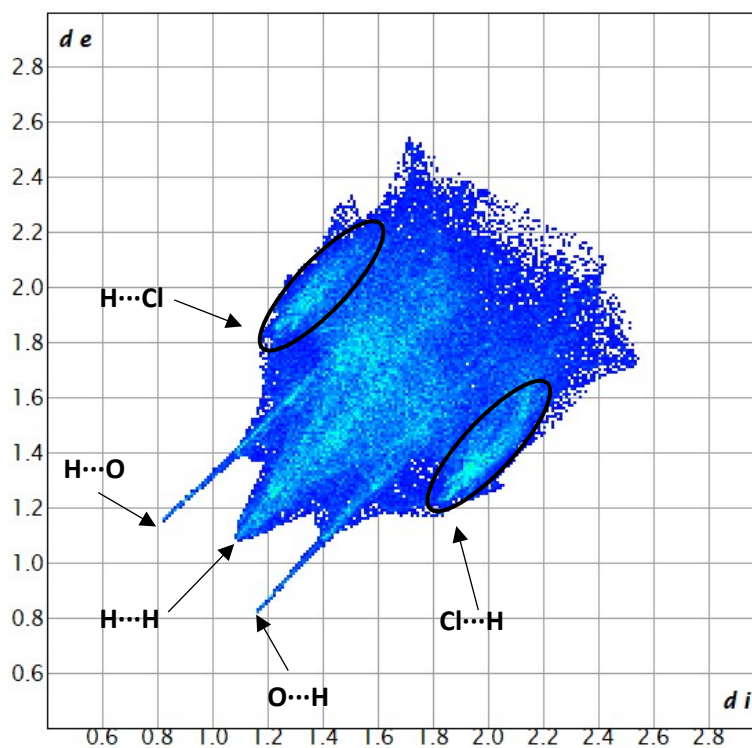

Figure S6. Fingerprint plot of **3**. Important intermolecular contacts are indicated with arrows.

### Hirshfeld surface of Fmoc-Ala(3-Cl)-O<sup>t</sup>Bu (**4**)

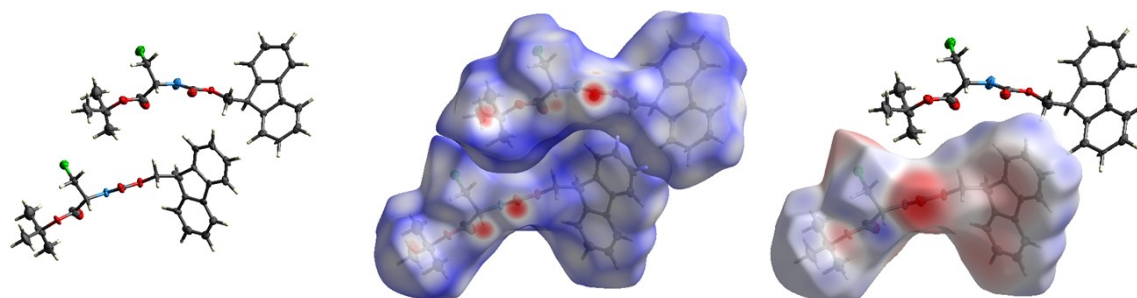

**Figure S7.** Molecular structures of **4** (left) and its Hirshfeld surface mapped with  $d_{\text{norm}}$  (middle) and ESP (right).

### Fingerprint plot of Fmoc-Ala(3-Cl)-O<sup>t</sup>Bu (**4**)

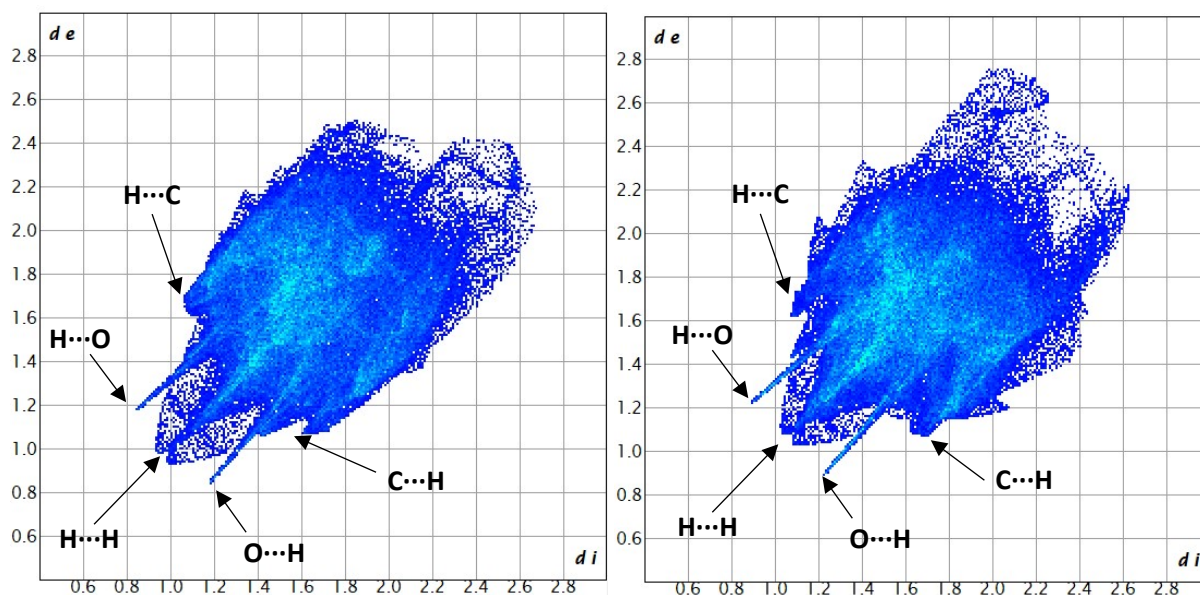

**Figure S8.** Fingerprint plots of two asymmetric molecules of **4**. The left plot corresponds to the top molecule and the right plot to the bottom molecule shown in Figure S7. Important intermolecular contacts are indicated with arrows.

### Hirshfeld surface of Boc-Ala(3-I)-OMe (**5**)

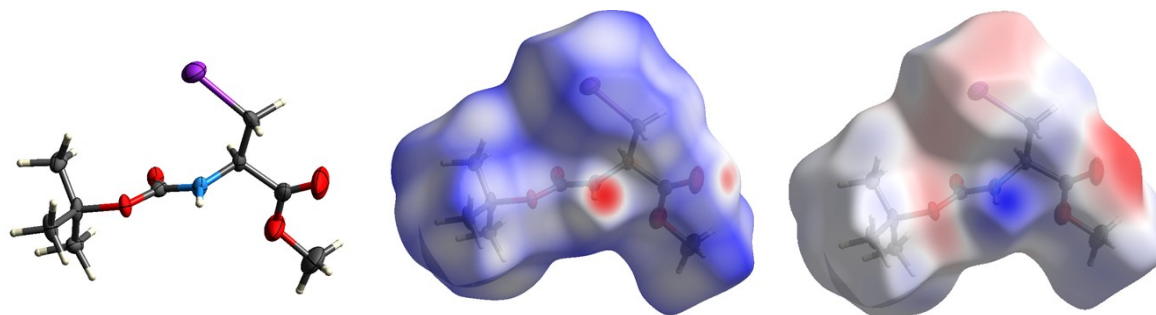

**Figure S9.** Molecular structure of **5** (left) and its Hirshfeld surface mapped with  $d_{\text{norm}}$  (middle) and ESP (right).

### Fingerprint plot of Boc-Ala(3-I)-OMe (**5**)

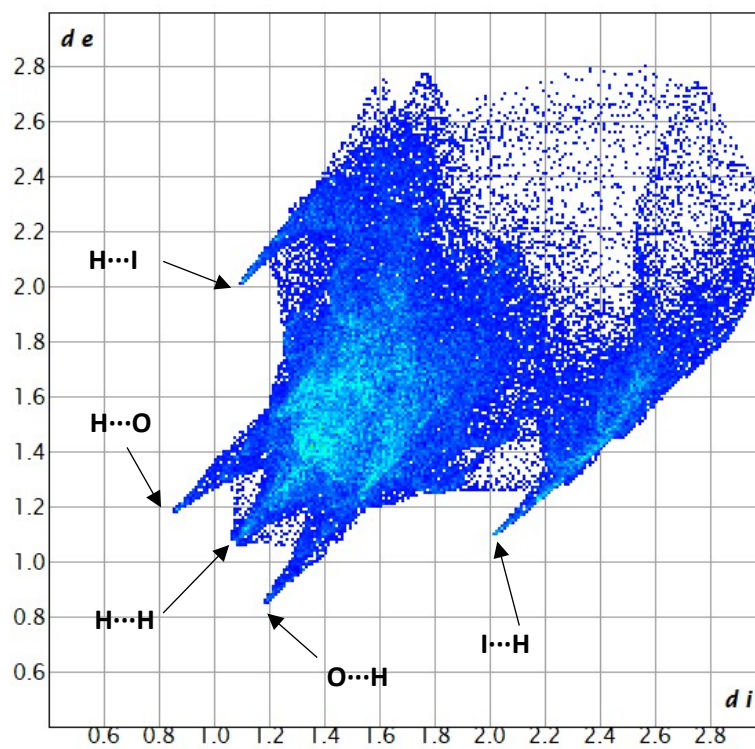

**Figure S10.** Fingerprint plot of **5**. Important intermolecular contacts are indicated with arrows.

### Hirshfeld surface of Boc-Ala(3-I)-O<sup>t</sup>Bu (6)

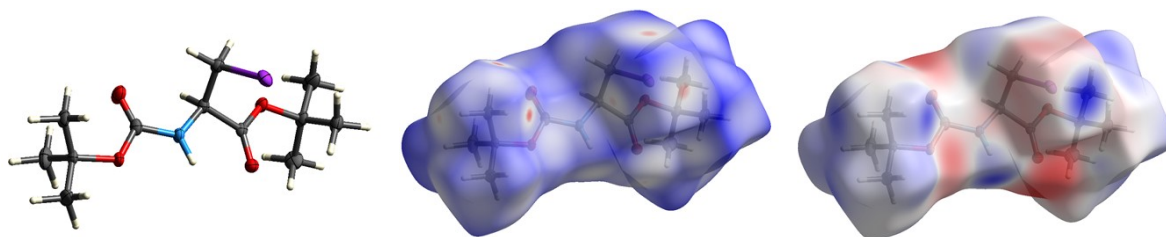

Figure S11. Molecular structure of **6** (left) and its Hirshfeld surface mapped with  $d_{\text{norm}}$  (middle) and ESP (right).

### Fingerprint plot of Boc-Ala(3-I)-O<sup>t</sup>Bu (6)

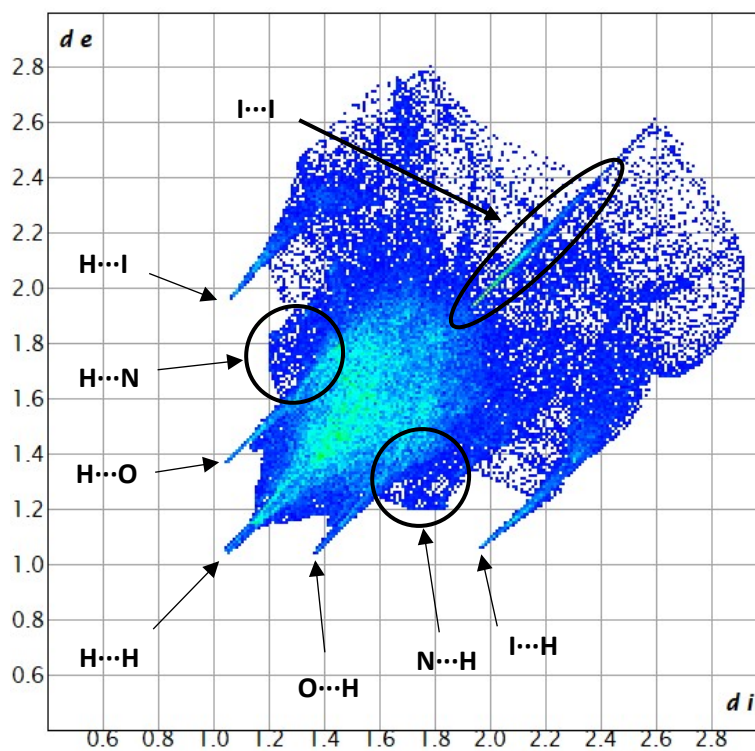

Figure S12. Fingerprint plot of **6**. Important intermolecular contacts are indicated with arrows.



### Hirshfeld surface of Boc-Ala(3-I)-OBn (7)

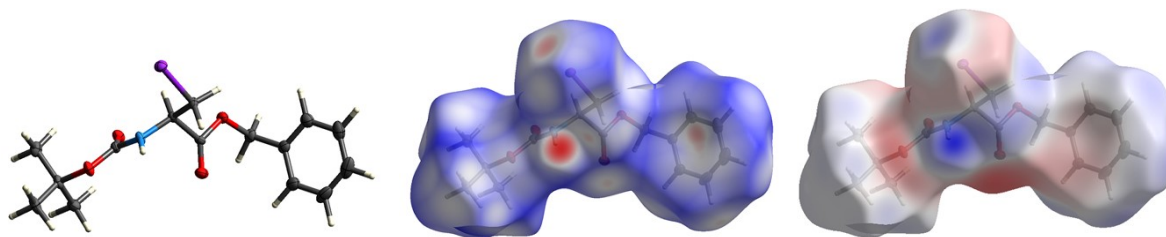

Figure S13. Molecular structure of **7** (left) and its Hirshfeld surface mapped with  $d_{\text{norm}}$  (middle) and ESP (right)

### Fingerprint plot of Boc-Ala(3-I)-OBn (7)

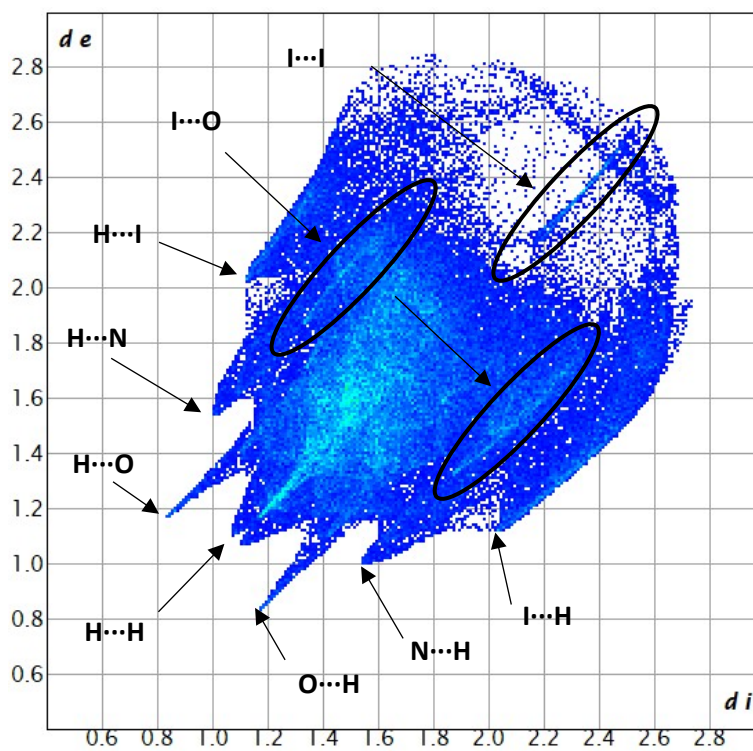

Figure S14. Fingerprint plot of **7**. Important intermolecular contacts are indicated with arrows.

### Hirshfeld surface of Fmoc-Ala(3-I)-O<sup>t</sup>Bu (**8**)

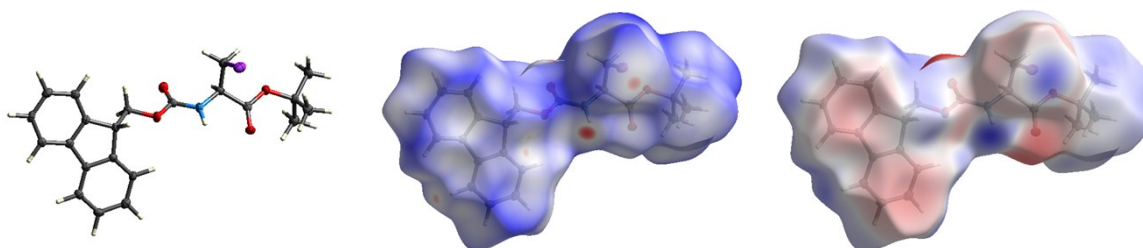

**Figure S15.** Molecular structure of **8** (left) and its Hirshfeld surface mapped with  $d_{\text{norm}}$  (middle) and ESP (right).

### Fingerprint plot of Fmoc-Ala(3-I)-O<sup>t</sup>Bu (**8**)

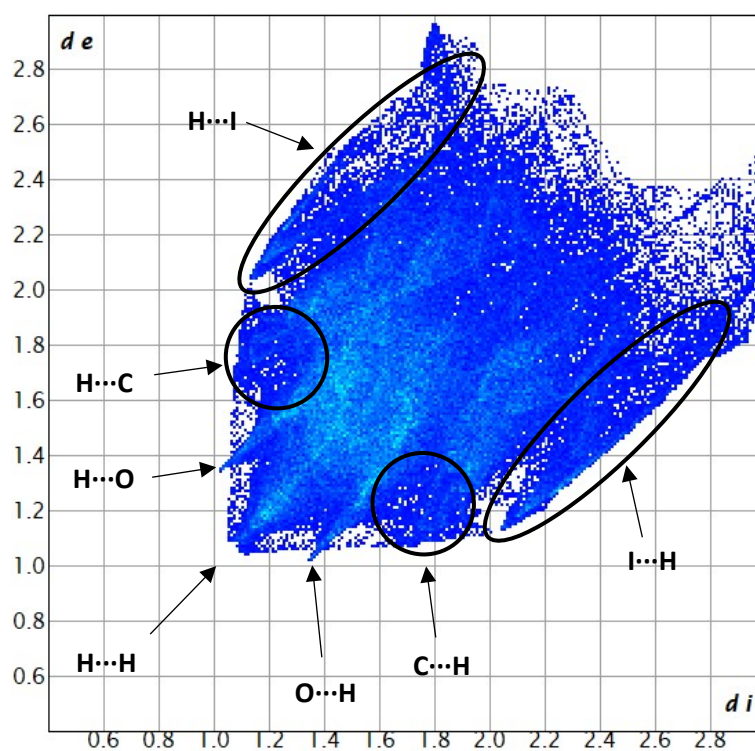

**Figure S16.** Fingerprint plot of **8**. Important intermolecular contacts are indicated with arrows.

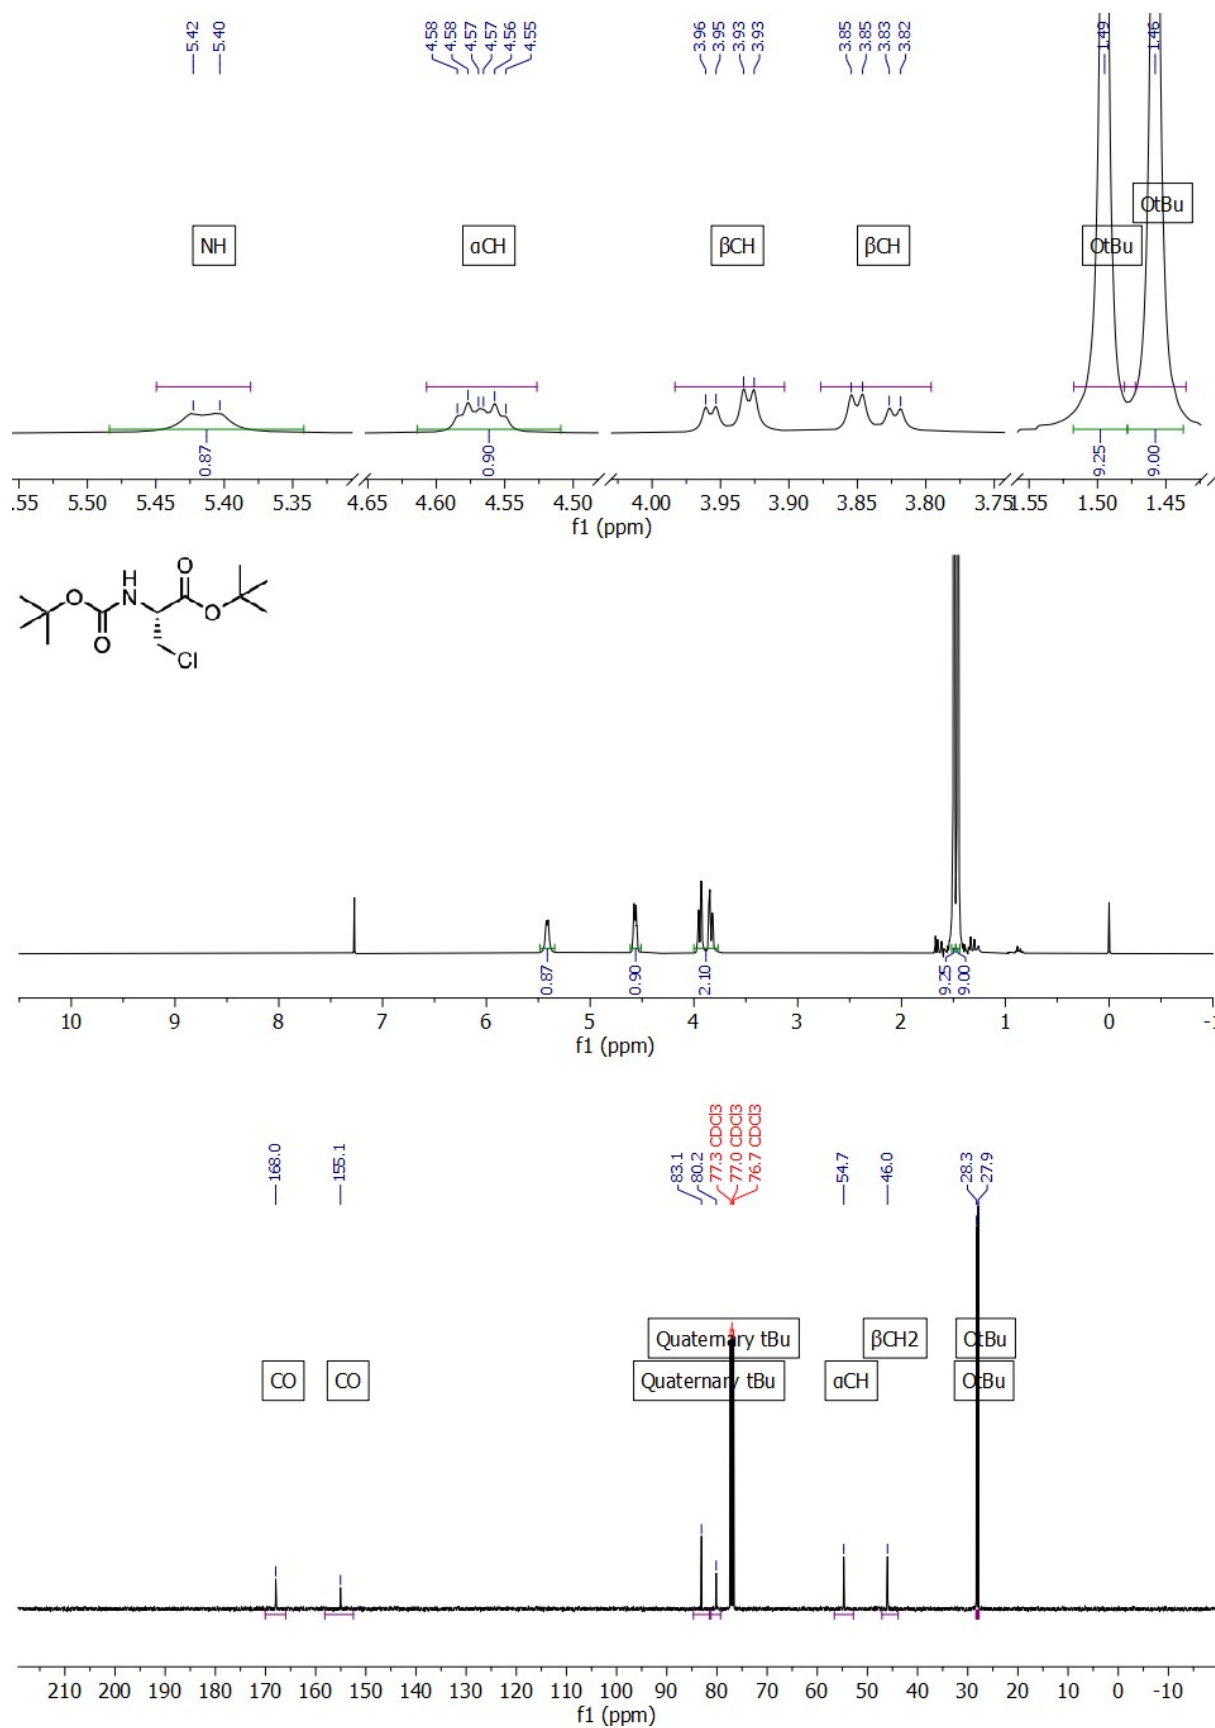

**Figure S17.** <sup>1</sup>H and <sup>13</sup>C NMR spectra of Boc-Ala(3-Cl)-OtBu (2) (CDCl<sub>3</sub>, 400/100 MHz, respectively).

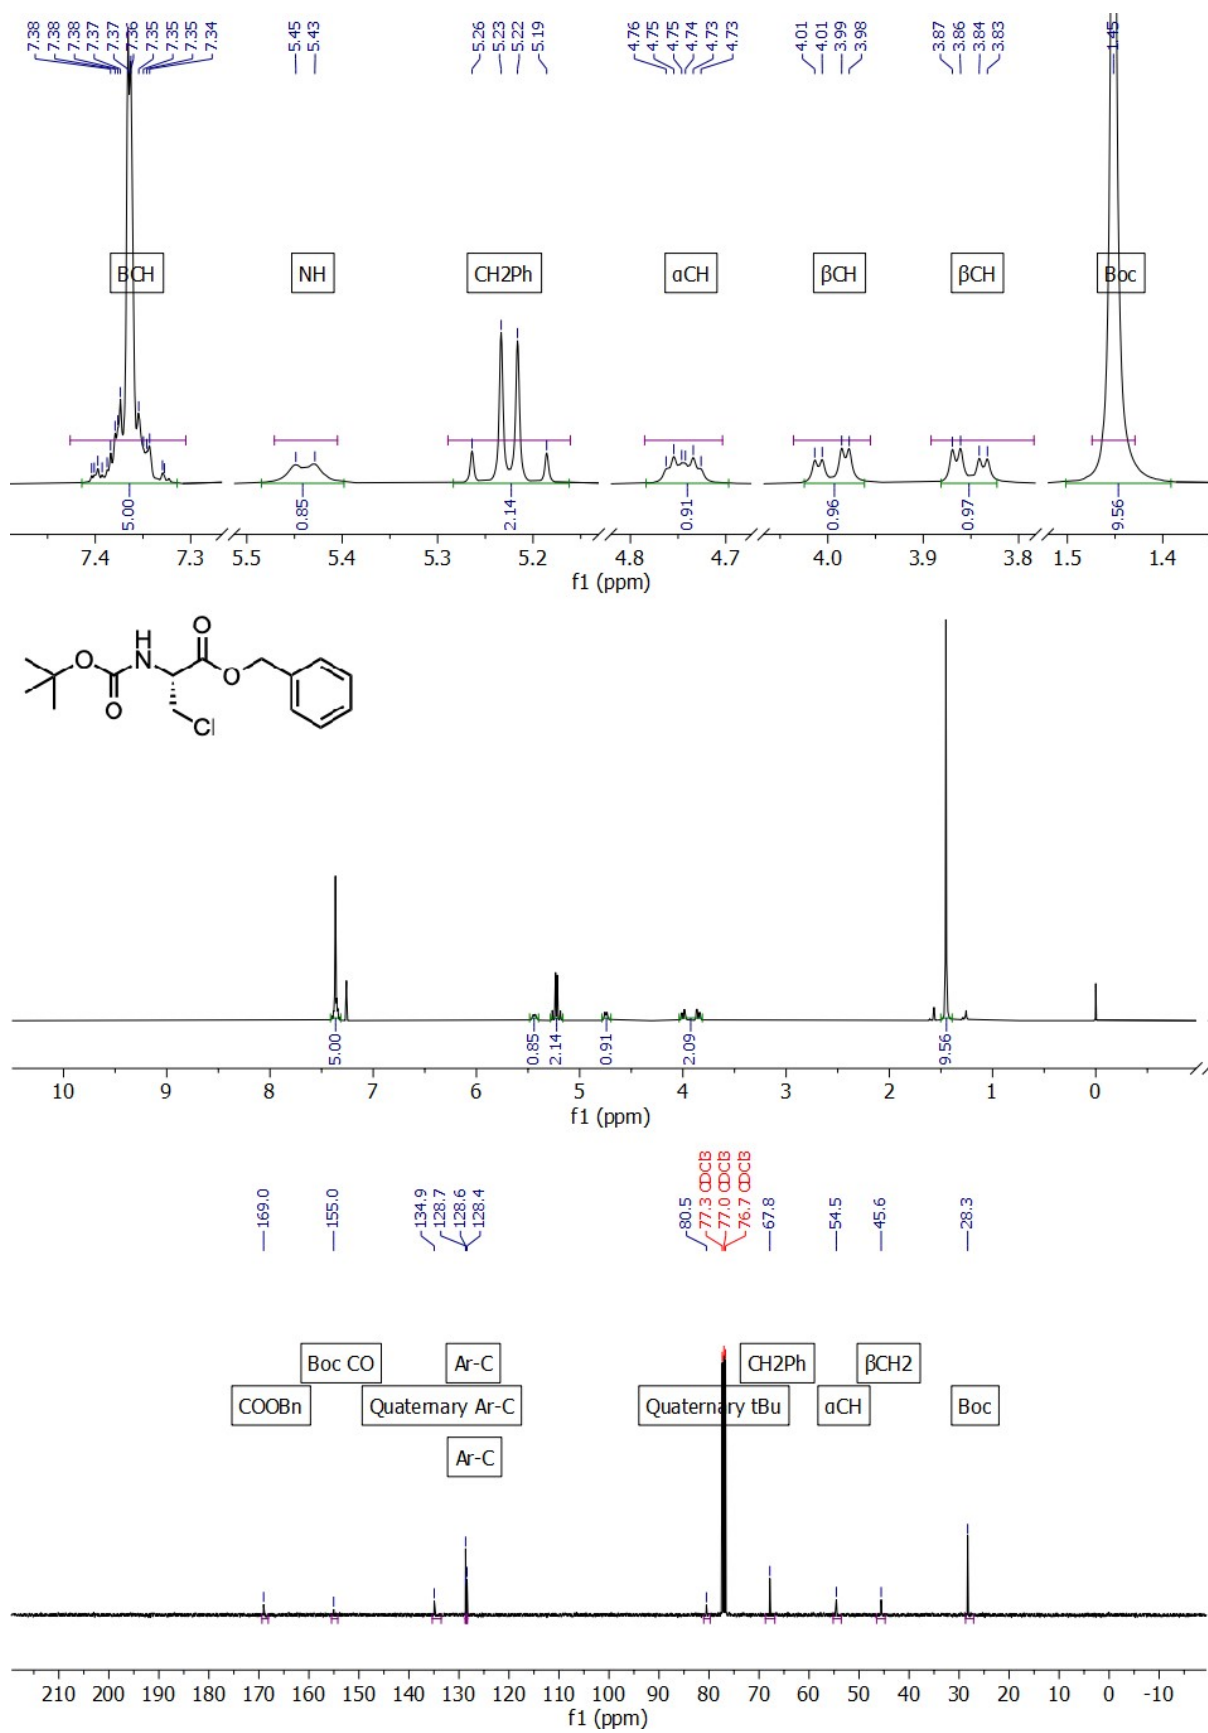

**Figure S18.** <sup>1</sup>H and <sup>13</sup>C NMR spectra of Boc-Ala(3-Cl)-OBn (**3**) (CDCl<sub>3</sub>, 400/100 MHz, respectively).
